# Supplementary material
Source: PubMed Central journal article supplement (PMC6445779)
Supplement: NIHMS1517328-supplement-1.pdf [file NIHMS1517328-supplement-1.pdf]

## Supplementary Methods

CB-17SC female mice (Taconic Farms, Germantown NY), were used to propagate subcutaneously implanted kidney/rhabdoid tumors, sarcomas (Ewing, osteosarcoma, rhabdomyosarcoma), and neuroblastoma (1). Mice bearing subcutaneous tumors each received drug when tumors reached between 200 mm<sup>3</sup> and 500 mm<sup>3</sup>. Mice were randomized to groups of 10. All mice were maintained under barrier conditions and experiments were conducted using protocols and conditions approved by the institutional animal care and use committee (IACUC) of the appropriate consortium member.

A tumor *event* was defined as a quadrupling of tumor volume from the day of treatment initiation, where tumor volume was estimated from caliper measurements as  $(4/3) \times \pi \times ((length + width) / 4)^3$ . Tumor volumes were measured weekly. The exact time-to-event was estimated by interpolating between the measurements directly preceding and following the event, assuming log-linear growth. Differences in event-free survival (EFS) between experimental groups were tested using the exact log-rank test or the Gehan-Wilcoxon test. Relative tumor volume (RTV) was defined for each mouse as the ratio of its current tumor volume divided by baseline tumor volume. Comparisons between treatments groups of the minimum attained RTV were performed using the Wilcoxon rank sum test.

The objective response categories of progressive disease (PD, which is subdivided among treated mice into PD without and with growth delay, PD1 and PD2 respectively), stable disease (SD), partial response (PR), complete response (CR), and maintained complete response (MCR), are defined below.

- **PD:** <50% tumor regression throughout study and >25% tumor growth at end of study
  - **PD1:** PD and the mouse's time-to-event  $\leq$  200% the Kaplan-Meier (KM) median time-to-event in control group
  - **PD2:** PD and the mouse's time-to-event > 200% of the KM median time-to-event in control group
- **SD:** <50% tumor regression throughout study and  $\leq$ 25% tumor growth at end of study
- **PR:**  $\geq$ 50% tumor regression at any point during study, but measurable tumor throughout study period
- **CR:** Disappearance of measurable tumor mass during the study period
- **MCR:** No measurable tumor mass for at least 3 consecutive weekly readings at any time after treatment has been completed

Overall group response was determined by the median response among evaluable mice. Each individual mouse was assigned a score from 0 to 10 based on their response (PD1 = 0, PD2 = 2, SD = 4, PR = 6, CR = 8, and MCR = 10) with the median for each group determining overall response. If the median score was halfway between a response categories, the objective response was assigned to the lower response category (e.g. a median response score of 9 is scored CR).

Mice with possible treatment-related death (i.e. drug toxicity), mice with failed engraftment, and mice which unexpectedly died for reasons unrelated to treatment were excluded from statistical analyses of time-to-event, minimum tumor volume, and objective response.

### **Reference**

1. Houghton PJ, Morton CL, Tucker C, Payne D, Favours E, Cole C, et al. The Pediatric Preclinical Testing Program: description of models and early testing results. *Pediatr Blood Cancer*. 2007;49(7):928-40.

Supplementary Table S1. *In vitro* activity of prexasertib against PPTC cell lines.

| Cell Line      | Histology                        | rIC <sub>50</sub> (nM)* | Panel rIC <sub>50</sub> /Line rIC <sub>50</sub> | In/Out% <sup>^</sup> |
|----------------|----------------------------------|-------------------------|-------------------------------------------------|----------------------|
| Karpas-299     | anaplastic large-cell lymphoma   | 0.9                     | 3.4                                             | -99                  |
| CCRF-CEM (1)   | acute lymphoblastic leukemia     | 4.2                     | 0.8                                             | -99                  |
| CCRF-CEM (2)   | acute lymphoblastic leukemia     | 3                       | 1.1                                             | -100                 |
| COG-LL-317     | acute lymphoblastic leukemia     | 2.6                     | 1.3                                             | -100                 |
| MOLT-4         | acute lymphoblastic leukemia     | 3.4                     | 0.9                                             | -100                 |
| NALM-6         | acute lymphoblastic leukemia     | 5.1                     | 0.6                                             | -100                 |
| RS4;11         | acute lymphoblastic leukemia     | 4.5                     | 0.7                                             | -99                  |
| Kasumi-1       | acute myeloid leukemia           | 3.5                     | 0.9                                             | -92                  |
| SJCRH30        | alveolar rhabdomyosarcoma        | 1.4                     | 2.3                                             | -96                  |
| Rh41           | alveolar rhabdomyosarcoma        | 8.8                     | 0.4                                             | -85                  |
| RD             | embryonal rhabdomyosarcoma       | 22                      | 0.1                                             | 8                    |
| Rh18           | embryonal rhabdomyosarcoma       | 2.9                     | 1.1                                             | -75                  |
| CHLA-10        | Ewing's sarcoma                  | 1.7                     | 1.9                                             | -88                  |
| CHLA-258       | Ewing's sarcoma                  | 2.4                     | 1.4                                             | -74                  |
| CHLA-9         | Ewing's sarcoma                  | 1.6                     | 2.0                                             | -64                  |
| TC-71          | Ewing's sarcoma                  | 1.6                     | 2.0                                             | -100                 |
| SJ-GBM2        | glioblastoma multiforme          | 2.6                     | 1.2                                             | -84                  |
| BT-12          | atypical teratoid/rhabdoid tumor | 6.6                     | 0.5                                             | 13                   |
| CHLA-266       | malignant rhabdoid tumor         | 15                      | 0.2                                             | 25                   |
| CHLA-136       | neuroblastoma                    | 0.9                     | 3.4                                             | -55                  |
| CHLA-90        | neuroblastoma                    | 3.7                     | 0.9                                             | -71                  |
| NB-1643        | neuroblastoma                    | 4.8                     | 0.7                                             | -90                  |
| NB-EBc1        | neuroblastoma                    | 1.7                     | 1.8                                             | -94                  |
| Ramos-RA1      | non-Hodgkin's lymphoma           | 6.5                     | 0.5                                             | -95                  |
| <b>Median</b>  |                                  | 3.2                     | 1.0                                             | -91                  |
| <b>Minimum</b> |                                  | 0.9                     | 0.1                                             | -100                 |
| <b>Maximum</b> |                                  | 22                      | 3.4                                             | 25                   |

\*rIC<sub>50</sub>: relative IC<sub>50</sub>

<sup>^</sup>relationship between number of input cells (in) and number of cells following 96h of treatment (out)

Supplementary Table S2. Summary of high content imaging results.

| Cell Line | Endpoint        | EC <sub>50</sub> (nM)* | Min. %responders** | Max. %responders |
|-----------|-----------------|------------------------|--------------------|------------------|
| A673      | γH2AX           | 4.7                    | 4.1                | 33               |
|           | cl. caspase 3   | 6.4                    | 3.7                | 17               |
|           | pATM S1981      | 4.7                    | 3.1                | 47               |
|           | pDNA-PKcs S2056 | 5.1                    | 3.3                | 32               |
| MG-63     | γH2AX           | 18                     | <1.0               | 69               |
|           | cl. caspase 3   | 21                     | 1.8                | 9                |
|           | pATM S1981      | 11                     | 3.3                | 67               |
|           | pDNA-PKcs S2056 | 10                     | 9.1                | 88               |
| SJCRH30   | γH2AX           | 3.9                    | <1.0               | 38               |
|           | cl. caspase 3   | 4.5                    | 1.5                | 23               |
|           | pATM S1981      | 4.4                    | <1.0               | 64               |
|           | pDNA-PKcs S2056 | 2.8                    | 7.3                | 79               |
| Rh41      | γH2AX           | 6.6                    | 2.0                | 36               |
|           | cl. caspase 3   | 16                     | 1.6                | 16               |
|           | pATM S1981      | 8.1                    | 1.6                | 45               |
|           | pDNA-PKcs S2056 | 7.4                    | 1.4                | 40               |
| RD        | γH2AX           | 7.0                    | 3.5                | 45               |
|           | cl. caspase 3   | 12                     | 3.6                | 19               |
|           | pATM S1981      | 9.6                    | 2.5                | 48               |
|           | pDNA-PKcs S2056 | 6.9                    | 2.5                | 53               |

\*Relative EC<sub>50</sub> values were calculated for each cell line and endpoint.

\*\*%responders = % of cells positive for specific endpoint

Supplementary Table S3. Summarized results of *in vivo* experiments evaluating prexasertib monotherapy in mouse models of pediatric tumors.

| Model         | Xenograft type | Tumor type                 | n/arm             | Chemotherapy     |                    | Analysis day | Chemotherapy                                               | Prexasertib  |
|---------------|----------------|----------------------------|-------------------|------------------|--------------------|--------------|------------------------------------------------------------|--------------|
|               |                |                            |                   | Agent            | Dose/Schedule      |              | % T/C or regression on treatment analysis day <sup>^</sup> |              |
| SJCRH30       | CDX            | alveolar rhabdomyosarcoma  | 6                 | Doxorubicin      | 5 mg/kg, Q7Dx4     | 41           | 48.8                                                       | <b>-66.8</b> |
| ST162         | PDX            | alveolar rhabdomyosarcoma  | 4                 | Doxorubicin      | 5 mg/kg, Q7Dx4     | 39           | <b>21.8</b>                                                | <b>-92.8</b> |
| CTG-0926      | PDX            | DSRCT*                     | 5                 | Doxorubicin      | 5 mg/kg, Q7Dx4     | 28           | 53.1                                                       | <b>-76.3</b> |
| CTG-1213      | PDX            | embryonal rhabdomyosarcoma | 5                 | Actinomycin D    | 0.25 mg/kg, Q21Dx2 | 29           | 63.3                                                       | <b>-22.6</b> |
| CTG-1116      | PDX            | embryonal rhabdomyosarcoma | 4                 | Doxorubicin      | 5 mg/kg, Q7Dx4     | 17           | 72.9                                                       | <b>8.1</b>   |
| RD            | CDX            | embryonal rhabdomyosarcoma | 5                 | Doxorubicin      | 5 mg/kg, Q7Dx4     | 104          | <b>19.0</b>                                                | 31.1         |
| CTG-0142      | PDX            | Ewing's sarcoma            | 5                 | Doxorubicin      | 5 mg/kg, Q7Dx4     | 32           | 55.7                                                       | 78.5         |
| CTG-0785      | PDX            | Ewing's sarcoma            | 5                 | Doxorubicin      | 5 mg/kg, Q7Dx4     | 14           | 75.7                                                       | 68.4         |
| CTG-0816      | PDX            | Ewing's sarcoma            | 5                 | Doxorubicin      | 5 mg/kg, Q7Dx4     | 46           | <b>18.0</b>                                                | 52.3         |
| CTG-0994      | PDX            | Ewing's sarcoma            | 5                 | Doxorubicin      | 5 mg/kg, Q7Dx4     | 21           | 104.4                                                      | <b>-56.8</b> |
| RD-ES         | CDX            | Ewing's sarcoma            | 8                 | Doxorubicin      | 2 mg/kg, Q7Dx1     | 25           | 130.7                                                      | 60.9         |
|               |                |                            |                   | Cyclophosphamide | 100 mg/kg, Q7Dx3   |              | <b>-60.7</b>                                               |              |
| CTG-1072      | PDX            | hepatoblastoma             | 5                 | Cisplatin        | 5 mg/kg, Q7Dx4     | 28           | 154.5                                                      | 171.0        |
| A-204         | CDX            | malignant rhabdoid tumor   | 6                 | Doxorubicin      | 5 mg/kg, Q7Dx4     | 52           | <b>37.5</b>                                                | 50.6         |
| CTG-0241      | PDX            | osteosarcoma               | 5                 | Doxorubicin      | 5 mg/kg, Q7Dx4     | 32           | 115.9                                                      | 62.8         |
| CTG-0242      | PDX            | osteosarcoma               | 5                 | Doxorubicin      | 5 mg/kg, Q7Dx4     | 39           | <b>5.2</b>                                                 | <b>9.1</b>   |
| CTG-0243      | PDX            | osteosarcoma               | 5                 | Doxorubicin      | 5 mg/kg, Q7Dx4     | 16           | 263.3                                                      | 46.0         |
| CTG-1064      | PDX            | osteosarcoma               | 5                 | Doxorubicin      | 5 mg/kg, Q7Dx4     | 33           | 181.6                                                      | 37.9         |
| Y79           | CDX            | retinoblastoma             | 6                 | Doxorubicin      | 5 mg/kg, Q7Dx4     | 44           | <b>48.5</b>                                                | <b>37.1</b>  |
| Rh10          | CDX            | alveolar rhabdomyosarcoma  | 10                | -                | -                  | 21           | -                                                          | <b>-58.2</b> |
| EW-5          | CDX            | Ewing's sarcoma            | 10                | -                | -                  | 14           | -                                                          | 107.7        |
| KT-12         | CDX            | malignant rhabdoid tumor   | 10                | -                | -                  | 21           | -                                                          | <b>45.9</b>  |
| KT-13         | CDX            | malignant rhabdoid tumor   | 10                | -                | -                  | 14           | -                                                          | 10.6         |
| RBD-1         | CDX            | malignant rhabdoid tumor   | 10                | -                | -                  | 21           | -                                                          | <b>-90.5</b> |
| COG-N-421x    | CDX            | neuroblastoma              | 10                | -                | -                  | 28           | -                                                          | <b>6.4</b>   |
| COG-N-453x    | CDX            | neuroblastoma              | 10                | -                | -                  | 23           | -                                                          | <b>-86.1</b> |
| COG-N-Felix-x | CDX            | neuroblastoma              | 10                | -                | -                  | 10           | -                                                          | <b>-50.0</b> |
| NB-1643-x     | CDX            | neuroblastoma              | 10                | -                | -                  | 19           | -                                                          | <b>1.8</b>   |
| NB-EBc1-x     | CDX            | neuroblastoma              | 10/5 <sup>†</sup> | -                | -                  | 7            | -                                                          | <b>-72.5</b> |
| NB-SD-x       | CDX            | neuroblastoma              | 10                | -                | -                  | 27           | -                                                          | <b>-40.7</b> |
| OS31          | CDX            | osteosarcoma               | 10                | -                | -                  | 21           | -                                                          | <b>64.5</b>  |
| OS33          | CDX            | osteosarcoma               | 10                | -                | -                  | 14           | -                                                          | <b>48.7</b>  |

\*desmoplastic small round cell tumor

<sup>†</sup>n = 10 vehicle, 5 prexasertib-treated

<sup>^</sup>: p < 0.05

**Supplementary Table S4. Summarized results of *in vivo* combination studies of prexasertib plus chemotherapy in pediatric cancer mouse models.**

| Model                                                                                                         | Xenograft type | Tumor type      | n/arm | Chemotherapy     |                             | Prexasertib dose Schedule                       | Analysis day | Chemotherapy                                                                                                                                                           | Prexasertib | Prexa + Chemo              | Combination effect <sup>^</sup> |
|---------------------------------------------------------------------------------------------------------------|----------------|-----------------|-------|------------------|-----------------------------|-------------------------------------------------|--------------|------------------------------------------------------------------------------------------------------------------------------------------------------------------------|-------------|----------------------------|---------------------------------|
|                                                                                                               |                |                 |       | Agent            | Dose, Schedule              |                                                 |              | % ΔT/C or regression on analysis day                                                                                                                                   |             |                            |                                 |
| SJCRH30                                                                                                       | CDX            | aRMS            | 4     | Doxorubicin      | 5 mg/kg, Q7Dx4              | 10 mg/kg [BIDx3D, restx4D]x4                    | 39           | 60.0                                                                                                                                                                   | -62.0       | -94.9 <sup>††</sup>        | Greater than additive           |
| SJCRH30                                                                                                       | CDX            | aRMS            | 5     | Cyclophosphamide | 100 mg/kg, Q7Dx4            | 10 mg/kg [BIDx3D, restx4D]x4                    | 46           | 33.5                                                                                                                                                                   | 0.10        | -91.4 <sup>††</sup>        | Greater than additive           |
|                                                                                                               |                |                 |       | Irinotecan       | 2.5 mg/kg, [QDx5,restx14]x2 |                                                 |              | 12.2                                                                                                                                                                   |             | -85.8 <sup>††</sup>        | Additive                        |
| Rh41                                                                                                          | CDX            | aRMS            | 4     | Cyclophosphamide | 100 mg/kg, Q7Dx4            | 10 mg/kg [BIDx3D, restx4D]x4                    | 88           | 42.9                                                                                                                                                                   | -36.8       | -71.5 <sup>††</sup>        | Additive                        |
|                                                                                                               |                |                 |       | Irinotecan       | 2.5 mg/kg, [QDx5,restx14]x2 |                                                 |              | -13.4                                                                                                                                                                  |             | -86.2 <sup>††</sup>        | Additive                        |
| CTG-1458                                                                                                      | PDX            | DSRCT           | 5     | Cyclophosphamide | 100 mg/kg, Q7Dx4            | 10 mg/kg [BIDx3D, restx4D]x4                    | 35           | 41.9                                                                                                                                                                   | -90.5       | -91.7 <sup>†</sup>         | No effect                       |
| RD                                                                                                            | CDX            | eRMS            | 5     | Doxorubicin      | 5 mg/kg, Q7Dx4              | 10 mg/kg [BIDx3D, restx4D]x4                    | 76           | 21.2                                                                                                                                                                   | 4.00        | 0.50 <sup>†</sup>          | Less than additive              |
| A673                                                                                                          | CDX            | Ewing's sarcoma | 5     | Irinotecan       | 2.5 mg/kg, [QDx5,restx16]x2 | 10 mg/kg [BIDx3D, restx4D]x4                    | 28           | 60.6                                                                                                                                                                   | 38.8        | -66.3 <sup>††</sup>        | Greater than additive           |
| COG-N-Felix-x                                                                                                 | CDX            | neuroblastoma   | 10    | Irinotecan       | 2.5 mg/kg, [QDx5]           | 10 mg/kg [BIDxD1,3,5]x3                         | 14           | 0.50                                                                                                                                                                   | -4.10       | -85.0 <sup>††</sup>        | Additive                        |
| NB-EBc1-x                                                                                                     | CDX            | neuroblastoma   | 10    | Irinotecan       | 2.5 mg/kg, [QDx5]           | 10 mg/kg [BIDxD1,3,5]x3                         | 14           | -10.2                                                                                                                                                                  | 2.60        | -94.3 <sup>††</sup>        | Additive                        |
| CCSARC005                                                                                                     | PDX            | osteosarcoma    | 5     | Cisplatin        | 4 mg/kg, Q7Dx3              | 10 mg/kg (8 mg/kg in combo) [BIDx3D, restx4D]x4 | 62           | 63.1                                                                                                                                                                   | 63.7        | -23.0 <sup>††</sup>        | Greater than additive           |
| aRMS: alveolar rhabdomyosarcoma; DSRCT: desmoplastic small round cell tumor; eRMS: embryonal rhabdomyosarcoma |                |                 |       |                  |                             |                                                 |              | <p><b>p &lt; 0.05 compared to vehicle</b><br/> <sup>*</sup> p &lt; 0.05 compared to prexasertib alone<br/> <sup>†</sup> p &lt; 0.05 compared to chemotherapy alone</p> |             | ^BLISS independence method |                                 |

**Supplementary Table S5. Summary of results from *n* of 1 Ewing's sarcoma PDX studies.**

| Model    | Irinotecan                          | Prexasertib | Prexa + Irinotecan/TMZ |
|----------|-------------------------------------|-------------|------------------------|
|          | Best $\Delta T/C$ or regression (%) |             |                        |
| CTG-0143 | -100.0                              | 32.0        | -100.0                 |
| CTG-1126 | 20.9                                | 78.4        | 16.0                   |
| CTG-1413 | -100.0                              | 4.27        | 106.0                  |
| CTG-1651 | -93.8                               |             | 7.63                   |
| CTG-1663 | 13.3                                | 53.8        |                        |
| CTG-2003 | 8.28                                | 54.7        | 23.5                   |
| CTG-2113 | 57.4                                | 73.0        | 26.6                   |

**Supplementary Table S6. Summary of *in vivo* combination results in PPTC models.**

| Model         | Tumor type                   | Prexasertib<br>10 mg/kg | Prexasertib<br>4 mg/kg | Irinotecan<br>2.5 mg/kg | Irinotecan (2.5 mg/kg)<br>+ prexasertib (4 mg/kg) | Combination v<br>prexasertib (10 mg/kg) | Combination v<br>irinotecan (2.5 mg/kg) |
|---------------|------------------------------|-------------------------|------------------------|-------------------------|---------------------------------------------------|-----------------------------------------|-----------------------------------------|
| NB-SD-x*      | neuroblastoma                | 44.9 / 2.5 <sup>^</sup> | 19.1 / 1.1             | 33.5 / 1.9              | 34.9 / 2.0                                        | <0.001                                  | 0.857                                   |
|               |                              | CR                      | PD1                    | CR                      | CR                                                |                                         |                                         |
| NB-EBc1-x     | neuroblastoma                | 25.3 / 6.8              | 11.8 / 3.2             | 17.9 / 4.8              | 32.9 / 8.8                                        | 0.011                                   | <0.001                                  |
|               |                              | PR                      | PD2                    | PR                      | PR                                                |                                         |                                         |
| NB-1643-x*    | neuroblastoma                | 22.7 / 2.4              | 13.8 / 1.5             | 22.0 / 2.3              | 25.0 / 2.6                                        | 0.121                                   | 0.919                                   |
|               |                              | PR                      | PD1                    | PR                      | CR                                                |                                         |                                         |
| COG-N-Felix-x | neuroblastoma                | 31.4 / 6.4              | 10.4 / 2.1             | 24.3 / 4.9              | 26.8 / 5.5                                        | 0.004                                   | 0.065                                   |
|               |                              | PR                      | PD2                    | PR                      | PR                                                |                                         |                                         |
| COG-N-453x*   | neuroblastoma                | 36.8 / 2.6              | 22.9 / 1.6             | 35.1 / 2.4              | 30.4 / 2.1                                        | 0.013                                   | 0.09                                    |
|               |                              | CR                      | PR                     | CR                      | CR                                                |                                         |                                         |
| COG-N-421x*   | neuroblastoma                | 33.3 / 2.0              | 19.5 / 1.2             | 31.3 / 1.9              | 31.0 / 1.9                                        | 0.07                                    | 0.994                                   |
|               |                              | PR                      | PD1                    | PR                      | PR                                                |                                         |                                         |
| EW-5          | Ewing's sarcoma              | 6.9 / 1.0               | 6.3 / 1.0              | 21.8 / 3.3              | 22.3 / 3.4                                        | <0.001                                  | 0.189                                   |
|               |                              | PD1                     | PD1                    | PD2                     | PD2                                               |                                         |                                         |
| Rh10          | alveolar<br>rhabdomyosarcoma | 53.3 / 1.8              | 27.5 / 0.9             | 67.6 / 2.2              | 53.8 / 1.8                                        | 0.653                                   | 0.041                                   |
|               |                              | PR                      | PD1                    | CR                      | CR                                                |                                         |                                         |
| Rh41          | alveolar<br>rhabdomyosarcoma | 27.7 / 2.1              | 17.0 / 1.3             | 31.1 / 2.4              | 39.5 / 3.0                                        | 0.202                                   | 0.029                                   |
|               |                              | PD2                     | PD1                    | PR                      | PR                                                |                                         |                                         |
| RBD-1         | malignant rhabdoid<br>tumor  | 77.4 / 4.5              | 39.0 / 2.3             | 27.4 / 1.6              | 43.8 / 2.5                                        | <0.001                                  | <0.001                                  |
|               |                              | MCR                     | PD2                    | SD                      | PR                                                |                                         |                                         |
| KT-12         | malignant rhabdoid<br>tumor  | 37.6 / 1.3              | 31.4 / 1.1             | 44.5 / 1.6              | 45.5 / 1.6                                        | 0.241                                   | 0.87                                    |
|               |                              | PD1                     | PD1                    | PD1                     | PD1                                               |                                         |                                         |
| OS31          | osteosarcoma                 | 20.6 / 1.2              | 18.3 / 1.1             | 25.0 / 1.5              | 33.0 / 2.0                                        | <0.001                                  | <0.001                                  |
|               |                              | PD1                     | PD1                    | PD1                     | PD1                                               |                                         |                                         |
| OS33          | osteosarcoma                 | 21.3 / 1.5              | 18.2 / 1.3             | 30.1 / 2.2              | 38.5 / 2.8                                        | <0.001                                  | <0.001                                  |
|               |                              | PD1                     | PD1                    | PD2                     | PD2                                               |                                         |                                         |

\*: *MYCN*-amplified xenograft lines.

<sup>^</sup>Data presented as "median time to event" / "ratio of median time to event for treated and control groups"  
(See Supplementary Materials for a more detailed explanation).

Red: significant differences in time to event between the single agent compared to the control.

Gray shading: significantly greater treatment effect for combination compared to single agent comparator at its optimal dose.



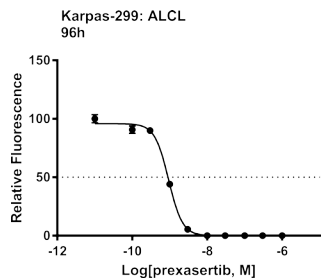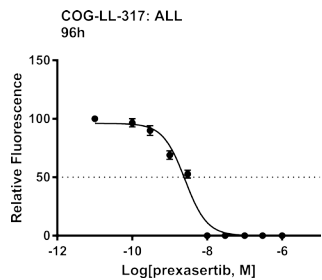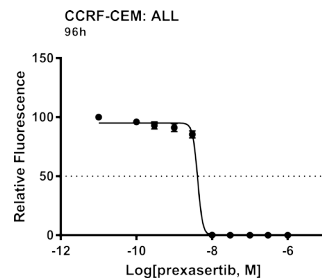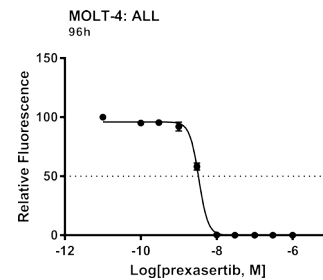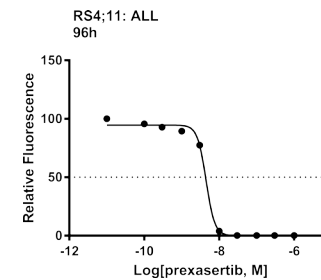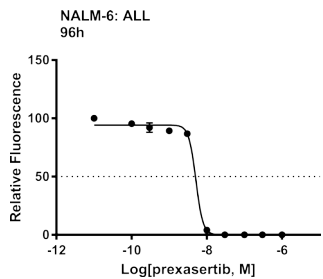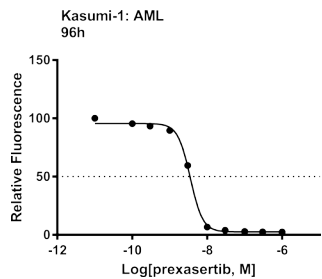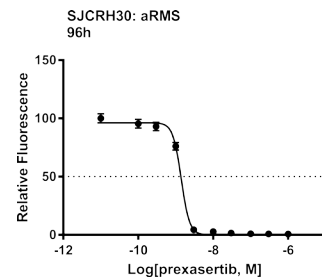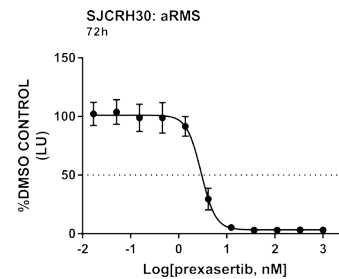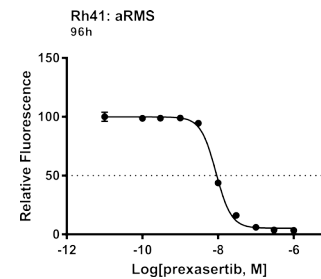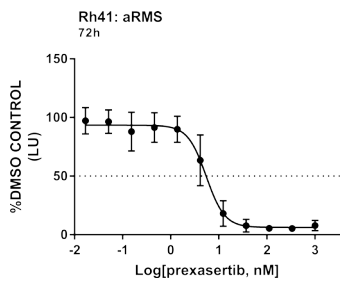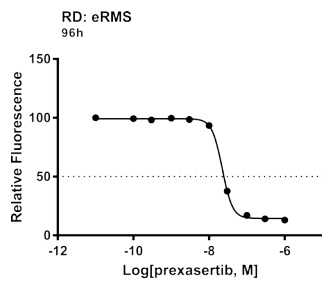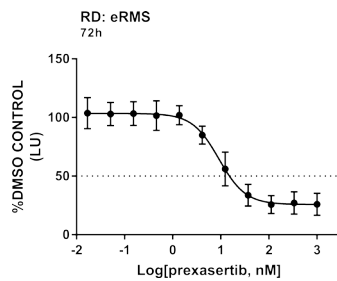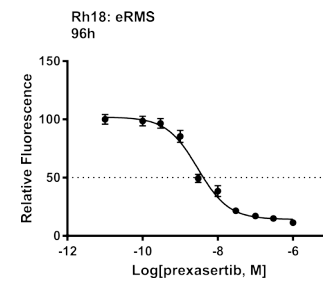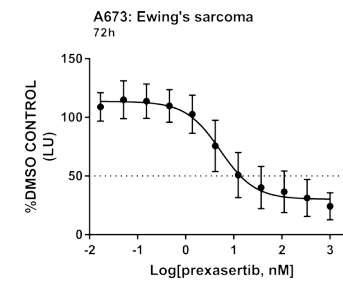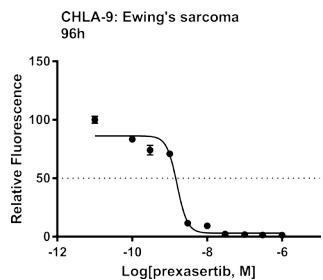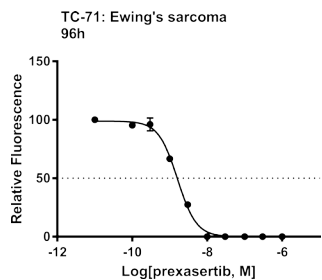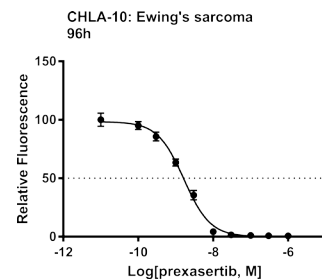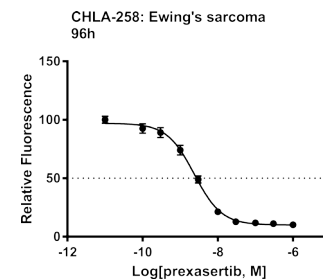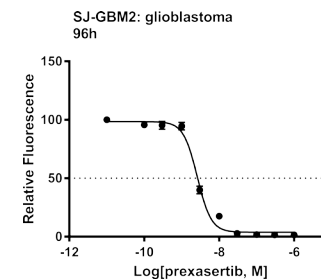

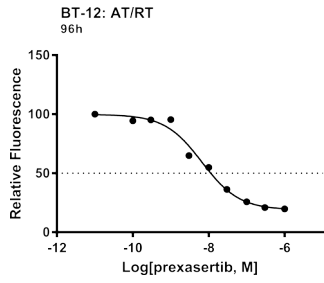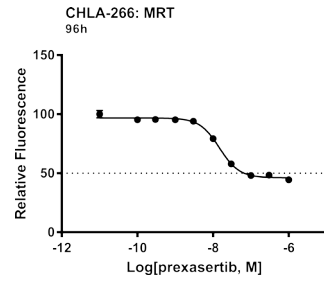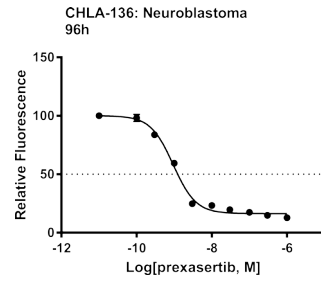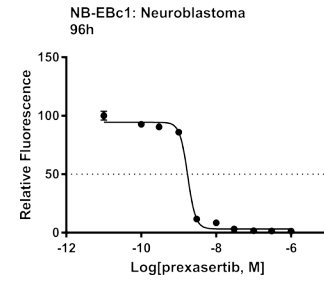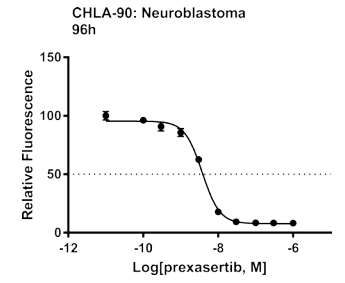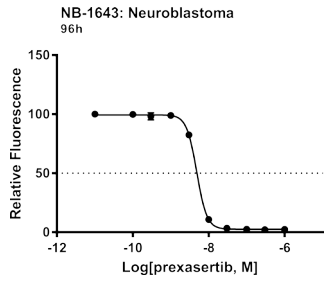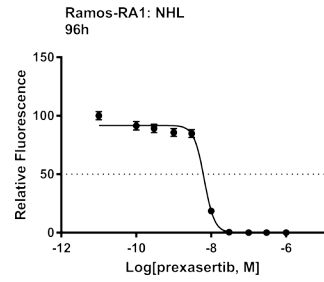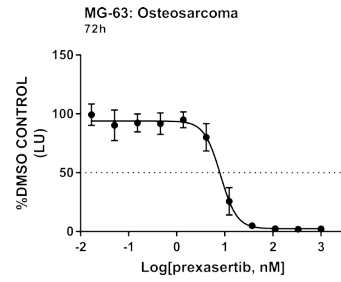

**Supplementary Figure S1. Prexasertib reduces cell proliferation in a panel of pediatric bone and soft tissue tumor cell lines.** Pediatric cancer cell lines were evaluated after 72h or 96h of prexasertib treatment by CellTiter Glo or digital image fluorescence microscopy, respectively, and  $EC_{50}$  values were calculated (reported in Table 1). Data are plotted as the average  $\pm$  SEM of triplicate experiments.

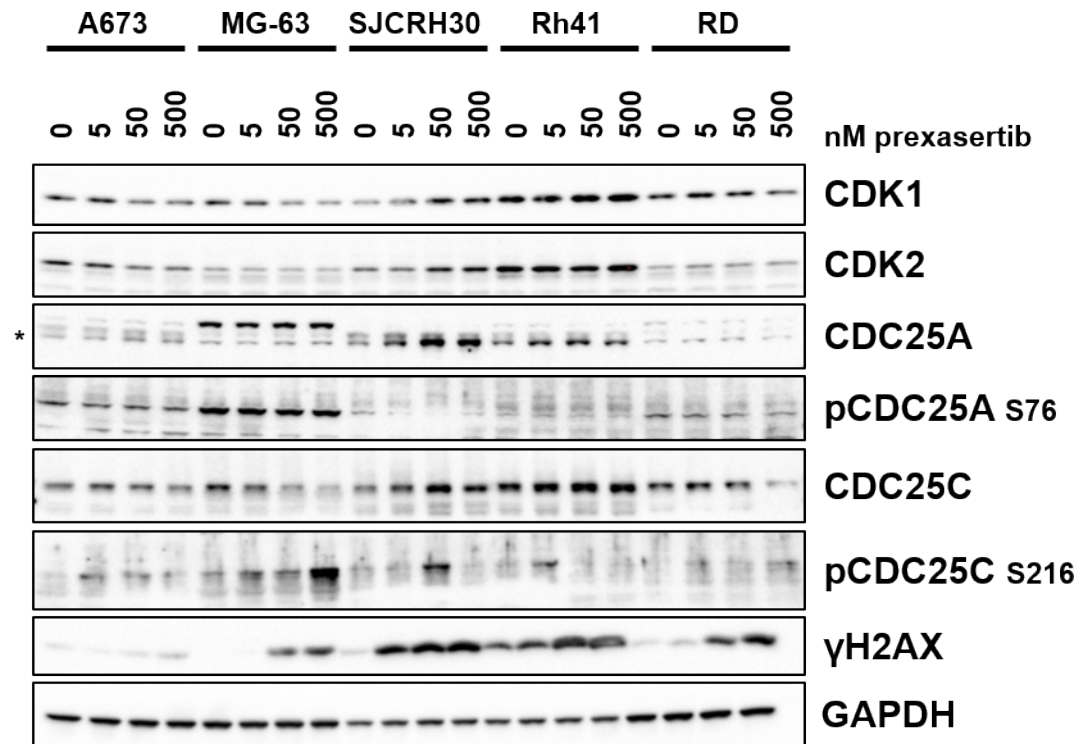

**Supplementary Figure S2. CHK1 inhibition by prexasertib has limited influence on CDC25A/C and CDK1/2 expression.** Pediatric sarcoma cell lines were treated with the indicated concentration of prexasertib for 24h. Whole cell lysates were probed for the indicated total and phosphorylated proteins. The asterisk next to the CDC25A panel marks the correct band size (59 kDa).

**A****Nuclei Count**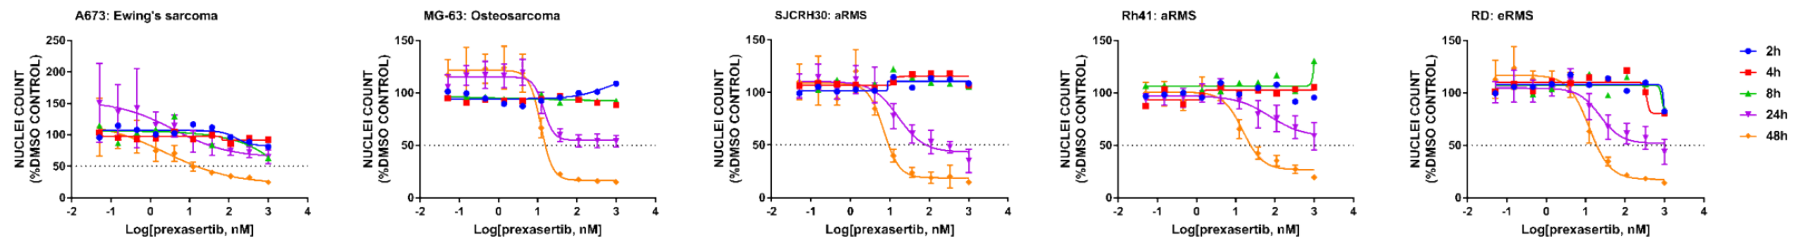**γH2AX**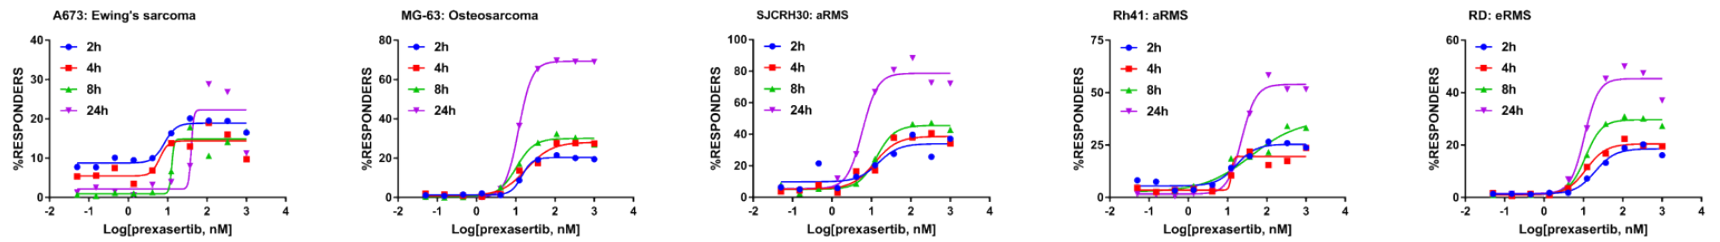**B****EdU**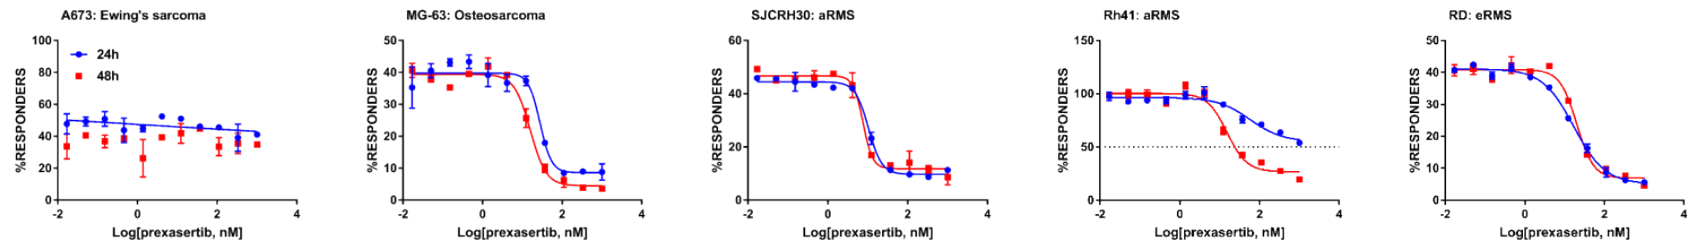**TUNEL**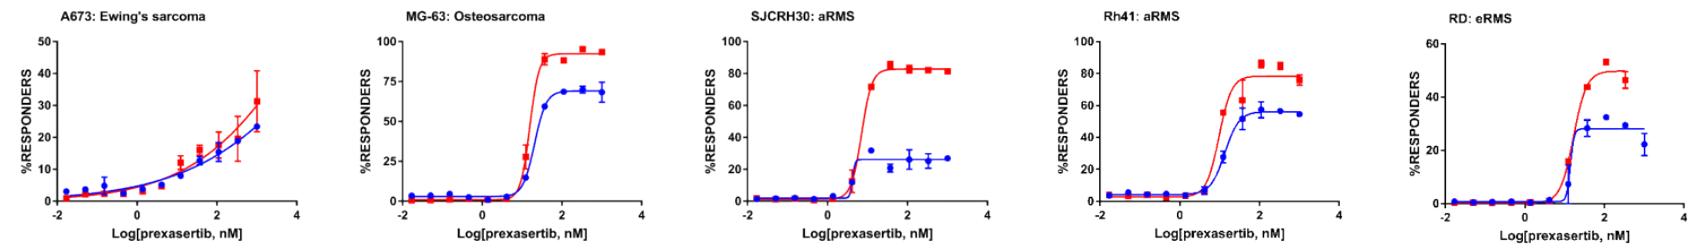

**Supplementary Figure S3. Prexasertib reduces DNA synthesis and increases DNA damage and cell death in pediatric sarcoma cell lines.** Pediatric sarcoma cell lines were treated with range of concentrations of prexasertib and evaluated at the time points indicated by high content imaging. Data are either expressed as relative to the DMSO control (nuclei count) or as %RESPONDERS (% of cells positive for a given endpoint.)

**A**CTG-1458: DSRCT  
Day 35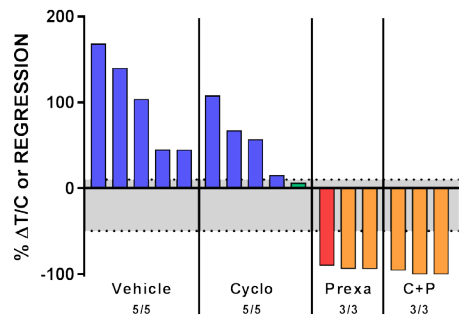**B**CTG-0926: DSRCT  
Day 28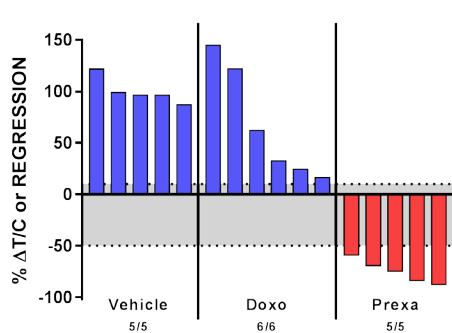**C**SJCRH30: aRMS  
Day 41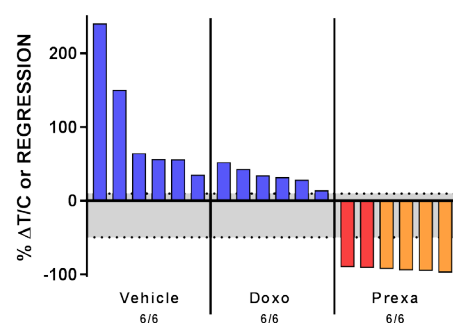**D**ST162: aRMS  
Day 39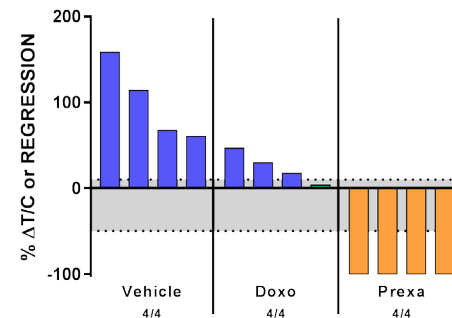**E**CTG-1213: eRMS  
Day 29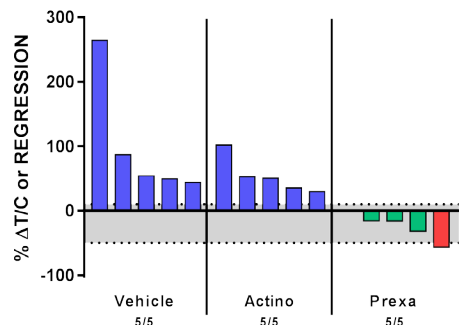**F**CTG-1116: eRMS  
Day 17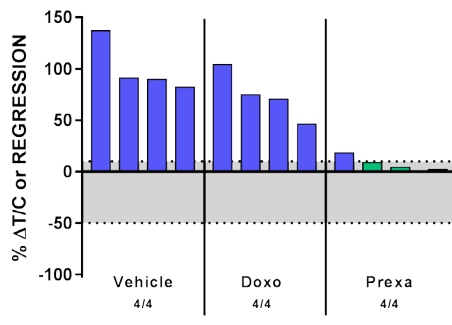**G**CTG-0994: Ewing's sarcoma  
Day 21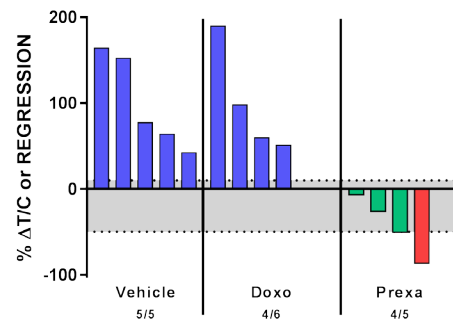**H**CTG-0242: Osteosarcoma  
Day 39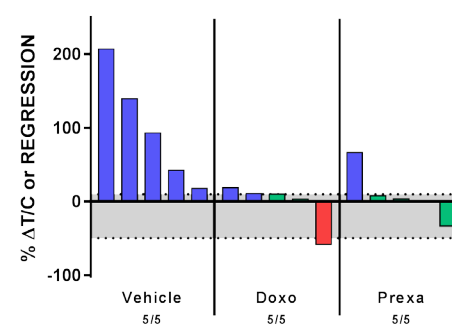**I**CTG-0816: Ewing's sarcoma  
Day 46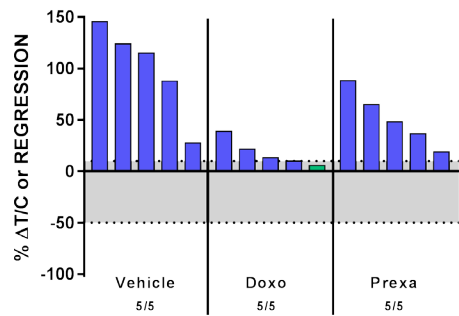**J**CTG-0241: Osteosarcoma  
Day 32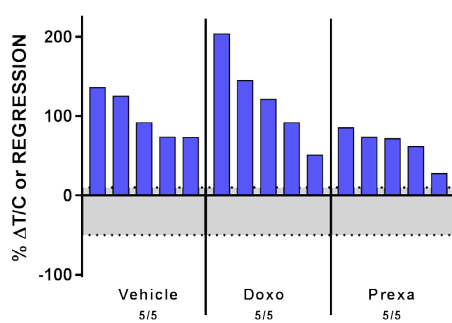**K**CTG-0243: Osteosarcoma  
Day 16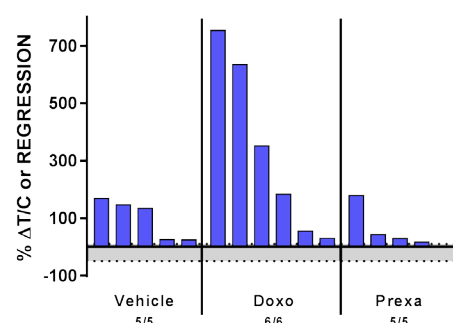**L**RD-ES: Ewing's sarcoma  
Day 25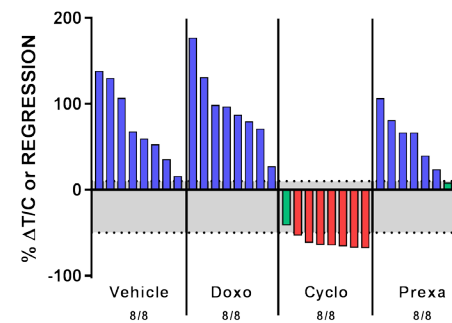

**M**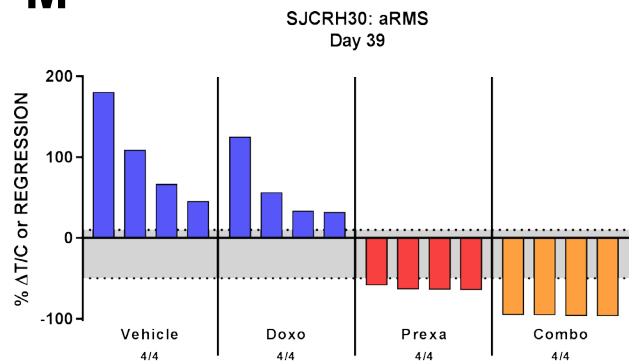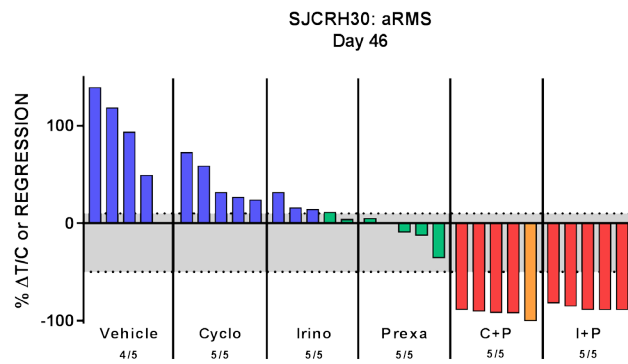**N**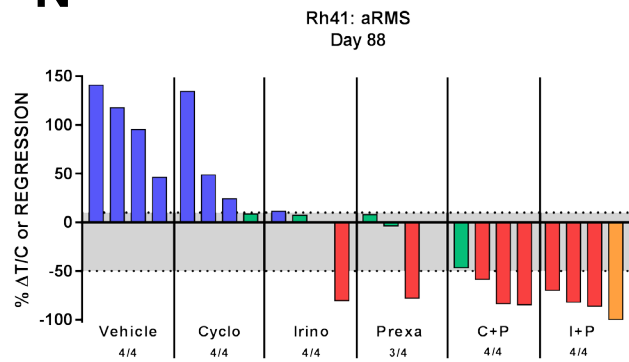**O**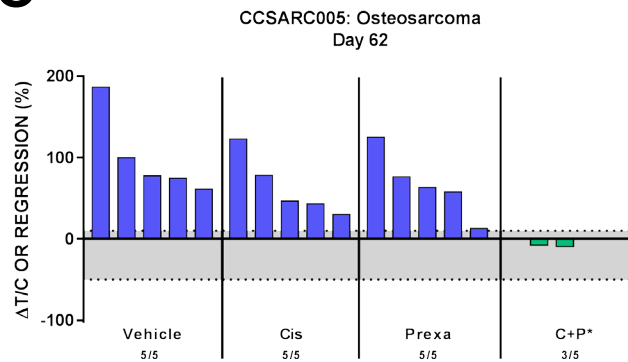**P**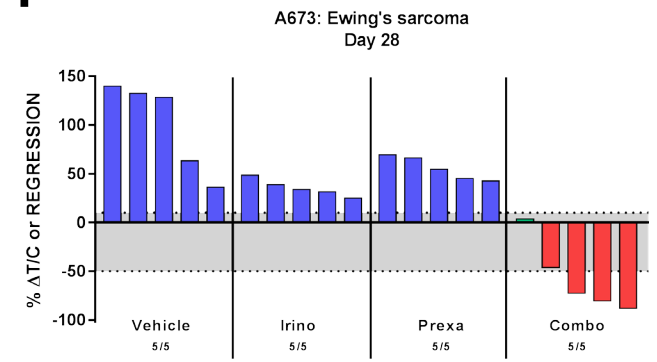

**Supplementary Figure S4. Waterfall plots for evaluation of prexasertib as a monotherapy or in combination with chemotherapy. A-L, Animals bearing pediatric sarcoma xenografts were treated with vehicle, prexasertib, or chemotherapy as single agents. A-F correspond to tumor growth curves in Figure 2. G-L correspond to studies displayed in Figure 3. M-P, Animals with pediatric sarcoma tumors were given vehicle, prexasertib, chemotherapy, or a combination of prexasertib and chemotherapy. Panels correspond with tumor growth curves shown in Figure 4. The specific chemotherapy for each study is indicated in each panel. The day of analysis is indicated directly under the model number. The notation under the treatment heading indicates the number of animals evaluable at the time point (x) out of the total n included at the start of the study (x/n). Unless otherwise indicated, sacrifice prior to analysis was due to excessive tumor burden. Blue bars: progressive disease (>10%); green bars: stable disease (-50% to 10%); red bars: partial response (≤-50% and > 14 mm<sup>3</sup>); orange bars: complete response (≤ 14 mm<sup>3</sup>). Statistical analyses from these studies are summarized in Supplementary Table S3.**

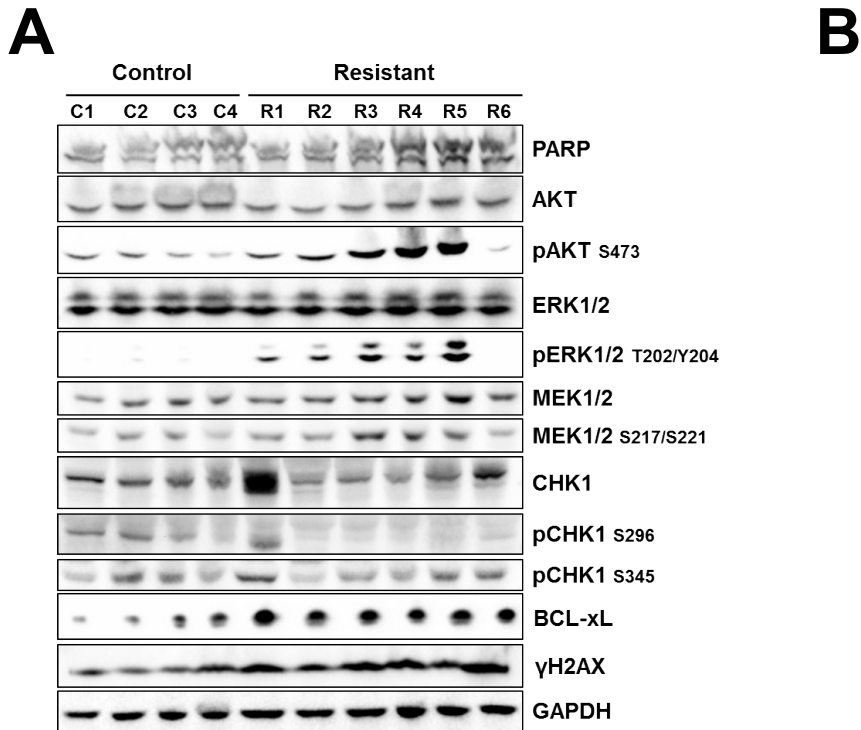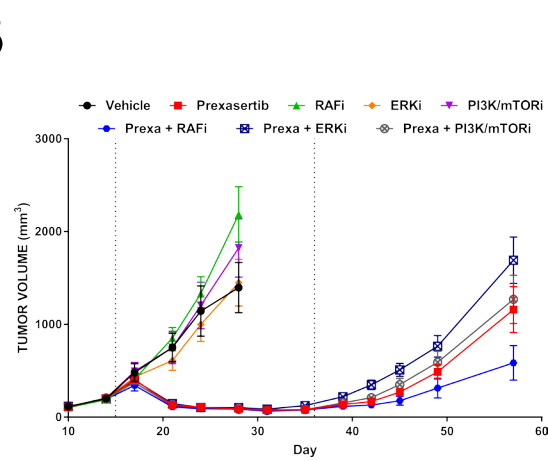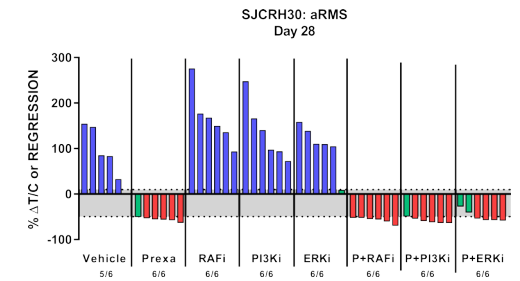

| Inhibitor              | Dose, Schedule     | Prexasertib dose Schedule   | Analysis day | Inhibitor % ΔT/C or regression on analysis day                                                                                                              | Prexasertib % ΔT/C or regression on analysis day | Combo % ΔT/C or regression on analysis day | Combination effect <sup>A</sup>        |
|------------------------|--------------------|-----------------------------|--------------|-------------------------------------------------------------------------------------------------------------------------------------------------------------|--------------------------------------------------|--------------------------------------------|----------------------------------------|
| RAFi (LY3074753)       | 25 mg/kg, BIDx21D  | 8 mg/kg [BIDx3D, restx4D]x4 | 28           | 146.5                                                                                                                                                       | -54.80                                           | -56.5 <sup>‡</sup>                         | No effect                              |
| ERKi (LY3214996)       | 50 mg/kg, BIDx21D  |                             |              | 81.3                                                                                                                                                        |                                                  | -48.5 <sup>‡</sup>                         | No effect                              |
| PI3K/mTORi (LY3023414) | 7.5 mg/kg, BIDx21D |                             |              | 116.4                                                                                                                                                       |                                                  | -57.5 <sup>‡</sup>                         | No effect                              |
|                        |                    |                             |              | <sup>p</sup> < 0.05 compared to vehicle<br><sup>A</sup> p < 0.05 compared to prexasertib alone<br><sup>‡</sup> p < 0.05 compared to pathway inhibitor alone |                                                  |                                            | <sup>A</sup> BLISS independence method |

**Supplementary Figure S5. PI3K/mTOR and RAS/MAPK signaling is upregulated in prexasertib-resistant SJCRH30 tumors compared to vehicle-treated xenografts but targeted inhibition of these pathways does not prevent acquired resistance to prexasertib.** **A**, Pieces of terminal SJCRH30 alveolar RMS xenografts were lysed and evaluated by immunoblot. Membranes were probed for the indicated total and phosphorylated proteins. **B**, Animals with SJCRH30 tumors were treated with prexasertib (8 mg/kg BIDx3D, restx4D; dose reduced from 10 mg/kg to prevent potential toxicity with combination treatment), a RAF inhibitor (RAFi, LY3074753), a PI3K/mTOR inhibitor (PI3Ki, LY3023414), an ERK inhibitor (ERKi, LY3214669), or a combination of prexasertib plus a pathway inhibitor. (*Top left*) Tumor growth curve. Data are plotted as mean volume ( $n = 6/\text{group}$ )  $\pm$  SEM; dotted lines: treatment interval. (*Top right*) Waterfall plot generated at Day 28. Numbers under treatment heading specifies number of animals evaluable at the time point (x) out of the total n included at the start of the study (x/n). Blue bars: progressive disease (>10%); green bars: stable disease (-50% to 10%); red bars: partial response ( $\leq -50\%$  and  $> 14 \text{ mm}^3$ ). (*Bottom*) Summary of statistical analyses.

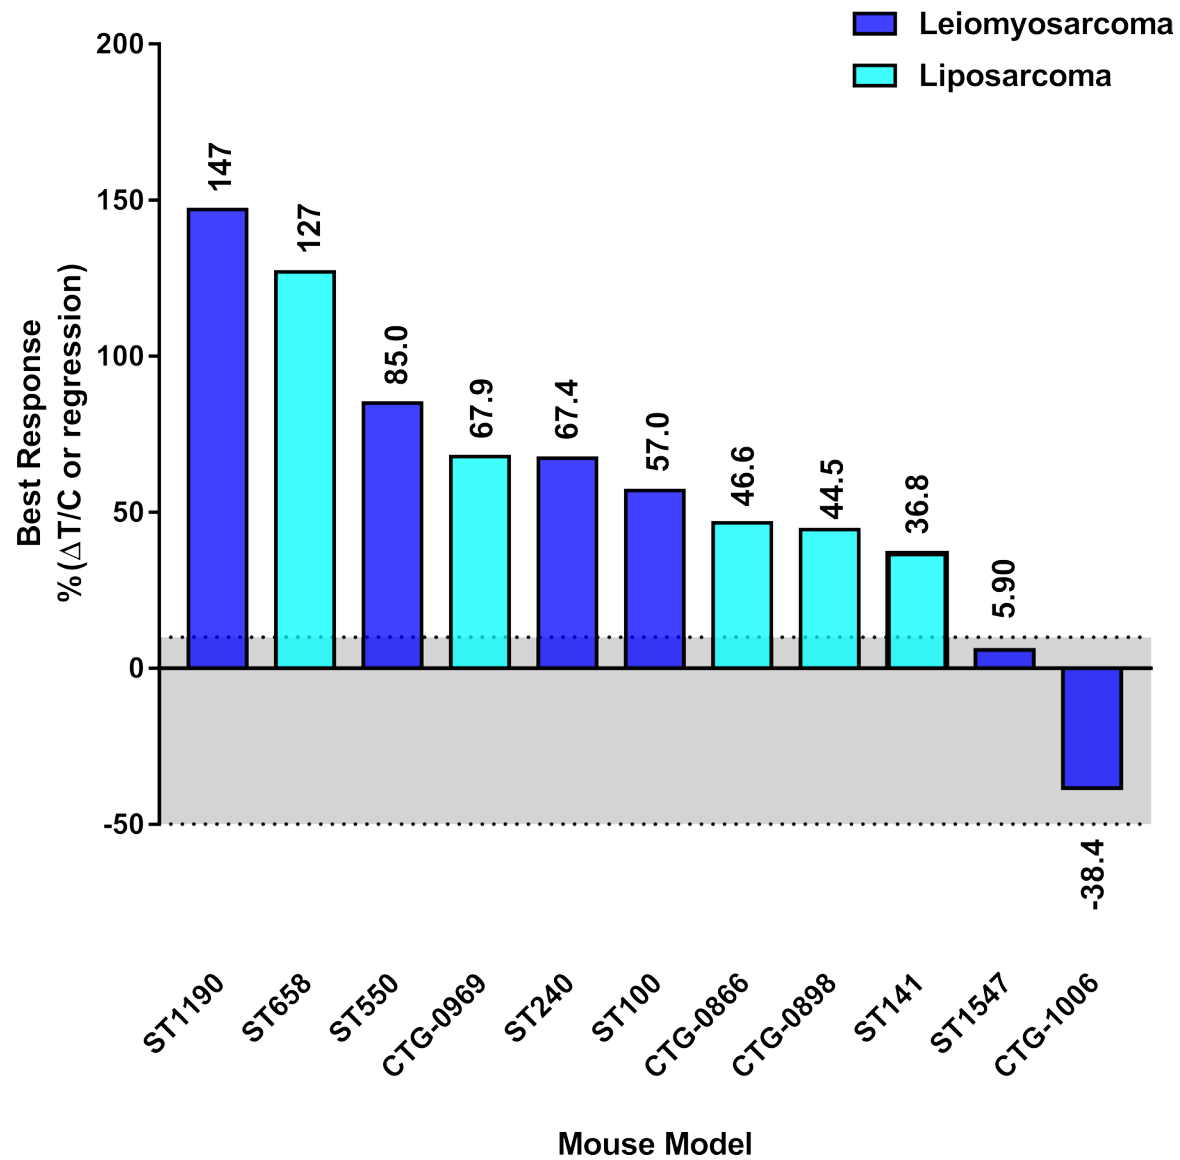

**Supplementary Figure S6. Animal PDX models of adult soft tissue sarcoma are resistant to prexasertib.** Eleven leiomyosarcoma or liposarcoma PDX models evaluated using an 'n of 1' study design. Each bar corresponds to the mouse from each model receiving single agent prexasertib. Gray shading indicates stable disease.



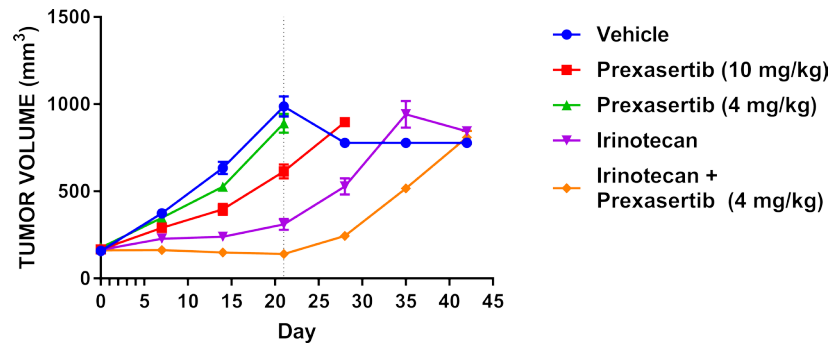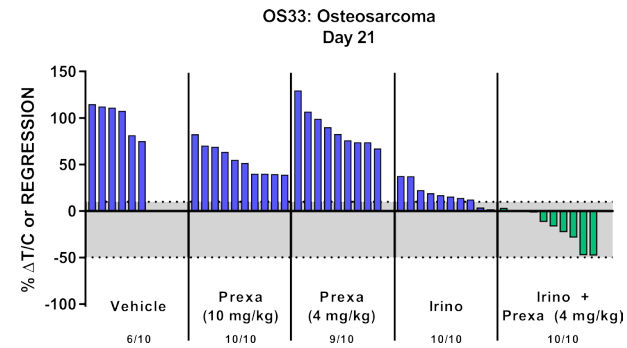

**Supplementary Figure S7. Concurrent administration of prexasertib and chemotherapy prolongs time to progression in the OS33 mouse model of human osteosarcoma.** Animals with osteosarcoma xenografts were treated with vehicle, prexasertib (10 mg/kg BID or 4 mg/kg on Days 1, 3, and 5 for 3 weeks), irinotecan (2.5 mg/kg on Days 1-5), or a combination of 4 mg/kg prexasertib plus irinotecan. Data are plotted as the average tumor volume in each treatment group. Dotted vertical line: end of prexasertib dosing interval; error bars: SEM. Waterfall plot was generated at Day 21; numbers under treatment heading specifies number of animals evaluable at the time point (x) out of the total *n* included at the start of the study (x/*n*). Blue bars: progressive disease (>10%); green bars: stable disease (-50% to 10%). Statistical analyses are presented in Supplementary Table S5.

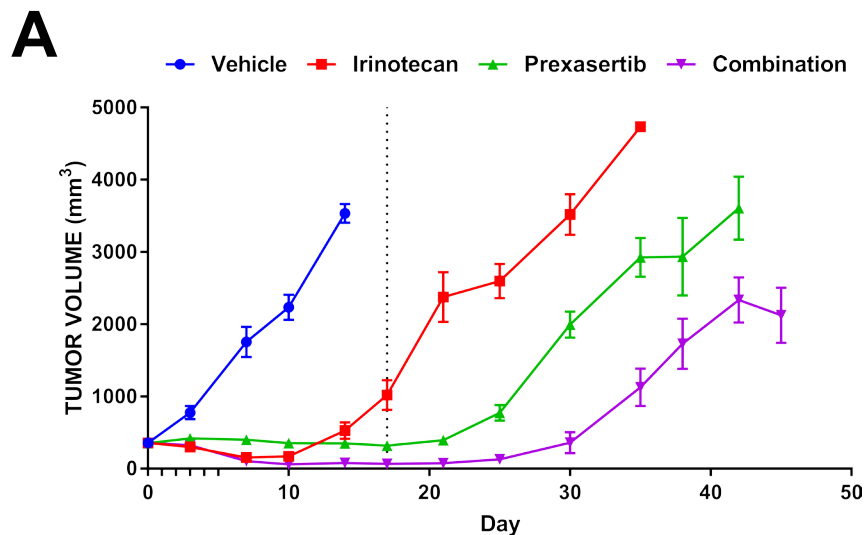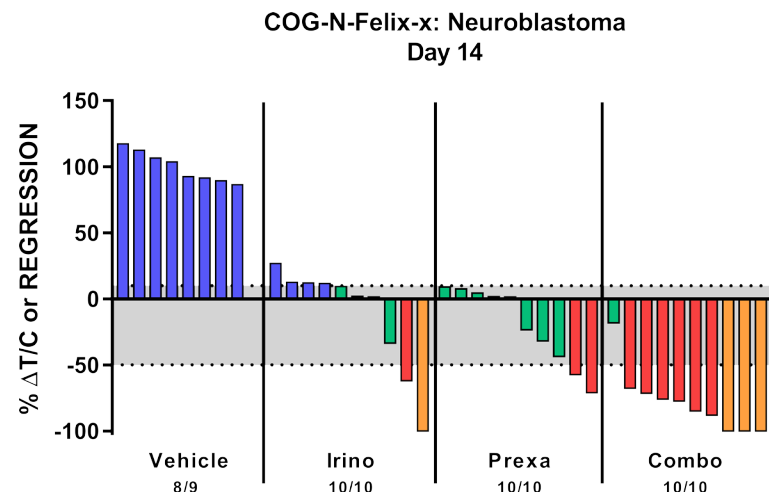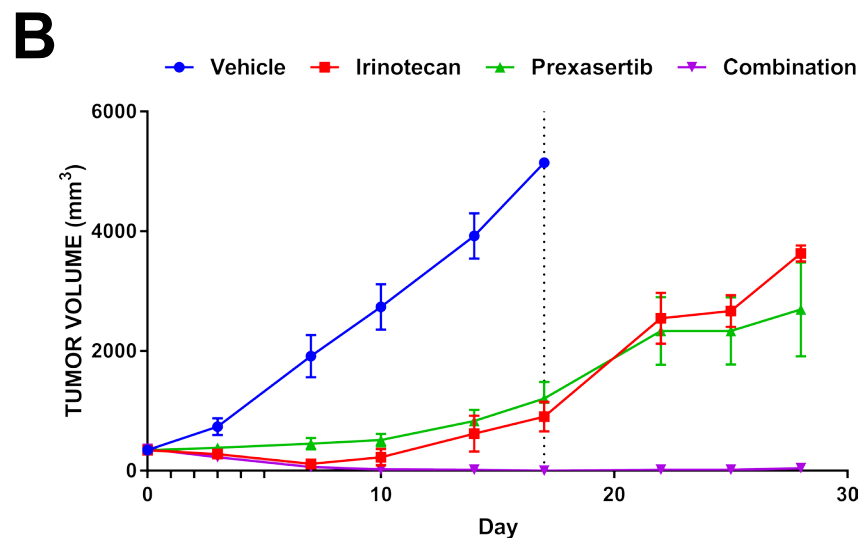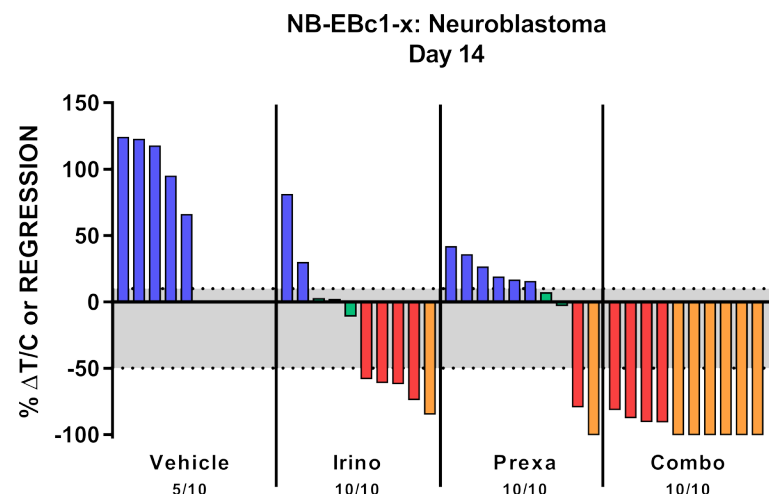

**Supplementary Figure S8. Combination of prexasertib with irinotecan delays neuroblastoma tumor regrowth.** Animals with neuroblastoma xenografts were treated with with vehicle, prexasertib (10 mg/kg BID on Days 1, 3, and 5 for 3 weeks), irinotecan (2.5 mg/kg on Days 1-5; indicated by hatch marks on x-axis), or the combination. Data are plotted as the average tumor volume in each treatment group. Dotted vertical line: end of prexasertib dosing interval; error bars: SEM. **A**, COG-N-Felix-x neuroblastoma CDX,  $n = 10/\text{arm}$ . Waterfall plot generated at Day 14. **B**, NB-EBc1-x neuroblastoma CDX,  $n = 10/\text{arm}$ . Waterfall plot generated at Day 14. Waterfall plots: numbers under treatment heading specifies number of animals evaluable at the time point (x) out of the total  $n$  included at the start of the study ( $x/n$ ). Blue bars: progressive disease (>10%); green bars: stable disease (-50% to 10%); red bars: partial response ( $\leq -50\%$  and  $> 14 \text{ mm}^3$ ); orange bars: complete response ( $\leq 14 \text{ mm}^3$ ). Statistical analyses are summarized in Supplementary Table S3.

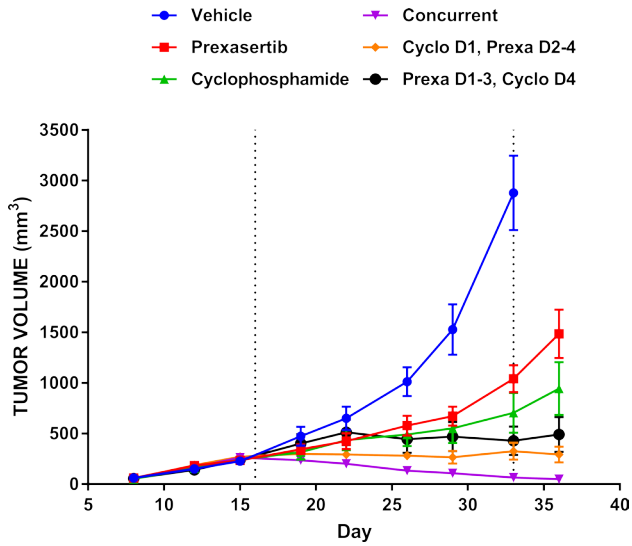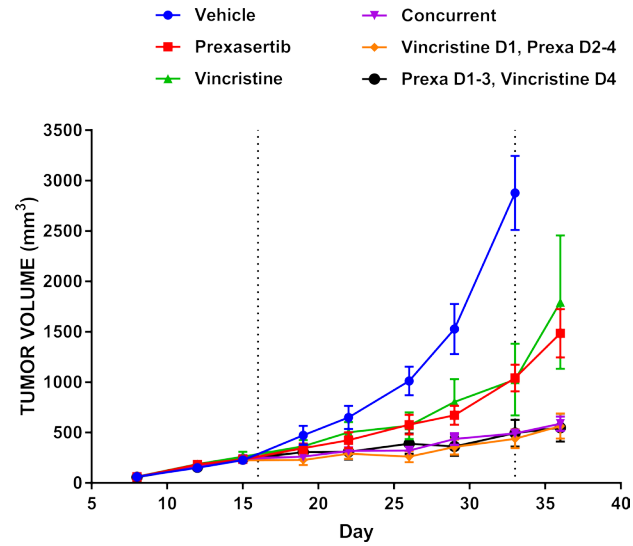

A673: Ewing's sarcoma  
Day 33

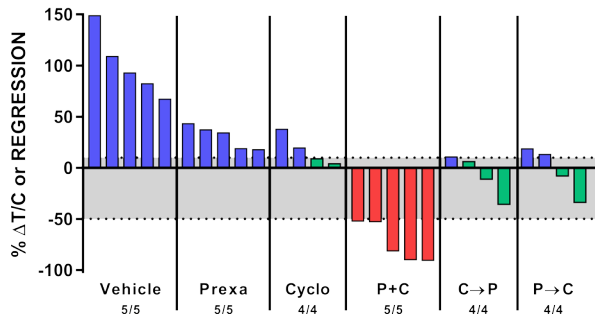

A673: Ewing's sarcoma  
Day 33

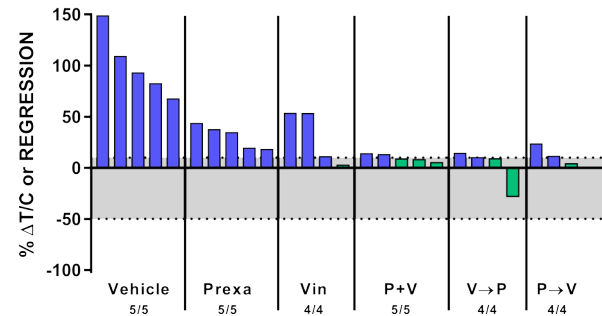

### Supplementary Figure S9. Concurrent administration of prexasertib and chemotherapy has comparable or superior activity to sequential combination treatment.

(Top) One *in vivo* study using the A673 Ewing's sarcoma CDX model is broken into two graphs for easier visualization of the data; the vehicle and prexasertib-treated arms are the same. The dosing interval is bracketed by dotted lines. Animals were given vehicle, prexasertib, or the indicated chemotherapy alone, or a combination of prexasertib and chemotherapy concurrently (purple) or staggered. For sequential treatment, either chemotherapy was given at Day 1 of the cycle, then prexasertib at Days 2-4 BID or prexasertib was administered at Days 1-3 BID with chemotherapy following at Day 4. Error bars: SEM.

(Middle) Corresponding waterfall plots generated at Day 33. The numbers under the treatment heading for each column specifies the number of animals evaluable at the time point (x) out of the total *n* included at the start of the study (x/n). Blue bars: progressive disease (>10%); green bars: stable disease (-50% to 10%); red bars: partial response (≤-50% and > 14 mm<sup>3</sup>).

(Bottom) Results of the statistical analyses conducted for this study.

| Chemotherapy                                                                                                                                                           |                  | Prexasertib dose<br>Schedule    | Analysis day | Combo schedule             | Chemotherapy                         | Prexasertib | Combination        | Combination effect <sup>^</sup>        |
|------------------------------------------------------------------------------------------------------------------------------------------------------------------------|------------------|---------------------------------|--------------|----------------------------|--------------------------------------|-------------|--------------------|----------------------------------------|
| Agent                                                                                                                                                                  | Dose, Schedule   |                                 |              |                            | % ΔT/C or regression on analysis day |             |                    |                                        |
| Cyclophosphamide                                                                                                                                                       | 100 mg/kg, Q7Dx4 | 10 mg/kg<br>[BIDx3D, restx4D]x4 | 33           | Concurrent                 |                                      |             | -78.5 <sup>‡</sup> | Greater than additive                  |
|                                                                                                                                                                        |                  |                                 |              | Chemo D1, Prexasertib D2-4 | 15.3                                 | 30.1        | 2.1 <sup>†</sup>   | Additive                               |
|                                                                                                                                                                        |                  |                                 |              | Prexasertib D1-3, Chemo D4 |                                      |             | 4.6 <sup>*</sup>   | No effect                              |
| Vincristine                                                                                                                                                            | 1 mg/kg, Q7Dx4   | 10 mg/kg<br>[BIDx3D, restx4D]x4 | 33           | Concurrent                 |                                      |             | 10.1 <sup>†</sup>  | No effect                              |
|                                                                                                                                                                        |                  |                                 |              | Chemo D1, Prexasertib D2-4 | 22.7                                 | 30.4        | 6.6 <sup>‡</sup>   | Additive                               |
|                                                                                                                                                                        |                  |                                 |              | Prexasertib D1-3, Chemo D4 |                                      |             | 8.4 <sup>*</sup>   | No effect                              |
| <p><b>p &lt; 0.05 compared to vehicle</b><br/> <sup>*</sup> p &lt; 0.05 compared to prexasertib alone<br/> <sup>‡</sup> p &lt; 0.05 compared to chemotherapy alone</p> |                  |                                 |              |                            |                                      |             |                    | <sup>^</sup> BLISS independence method |
